# Supplementary material
Source: Springer Nature journal article supplement (https://www.springermedizin.de/resource/supplementary/12886_2009_154_MOESM1_ESM.pdf/9474814)

# *Superior Retina - Wholemout*

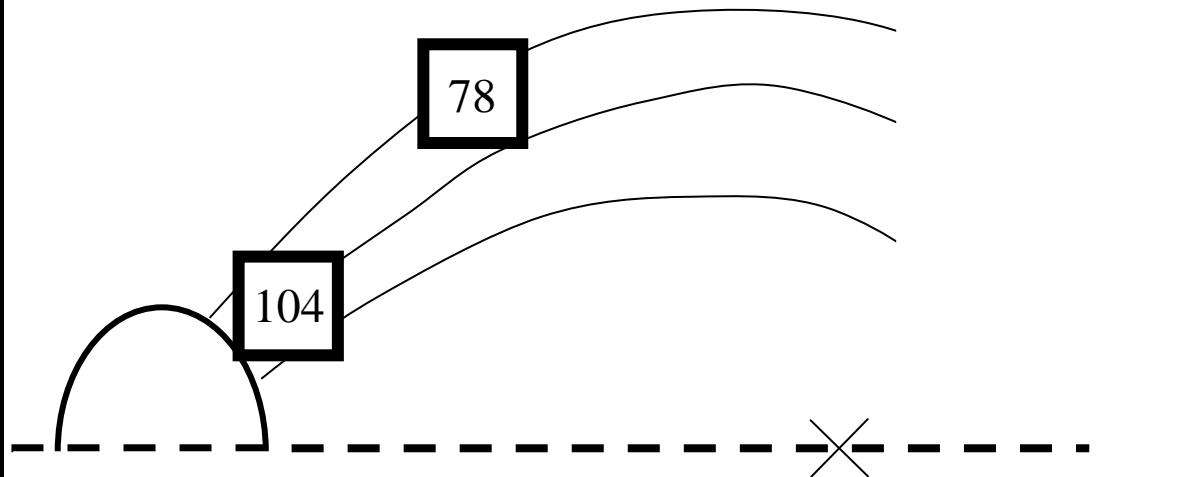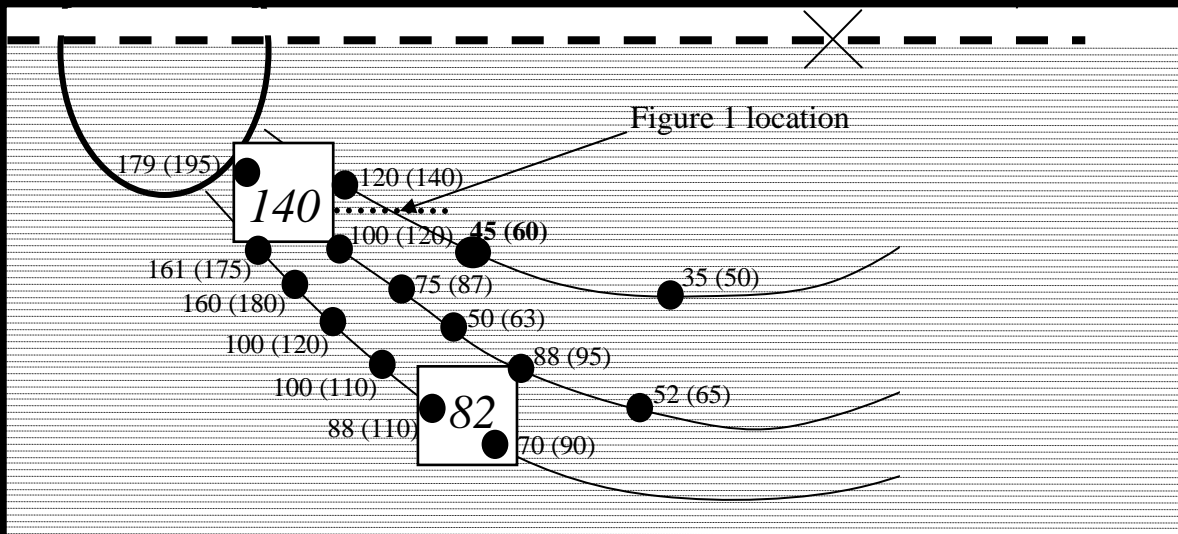

# *Inferior Retina - Transverse Sections*

Supplement: MOESM1 [file 9474814]
